# Supplementary material for: Gram-Positive <i>Staphylococcus aureus </i>LTA Promotes Distinct Memory-like Effects in Murine Bone Marrow Neutrophils
Source: Preprints.org preprint supplement (doi:10.20944/preprints202112.0009.v1), 2021-12-01
Supplement: Supplementary file 1 [file supplementary]

# Gram-positive *Staphylococcus aureus* LTA promotes distinct memory-like effects in murine bone marrow neutrophils

Trim Lajqi<sup>1</sup>, David Frommhold<sup>2</sup>, Maylis Braun<sup>1</sup>, Simon Alexander Kranig<sup>1</sup>, Johannes Pöschl<sup>1</sup> and Hannes Hudalla<sup>1</sup>

## Supplementary Material

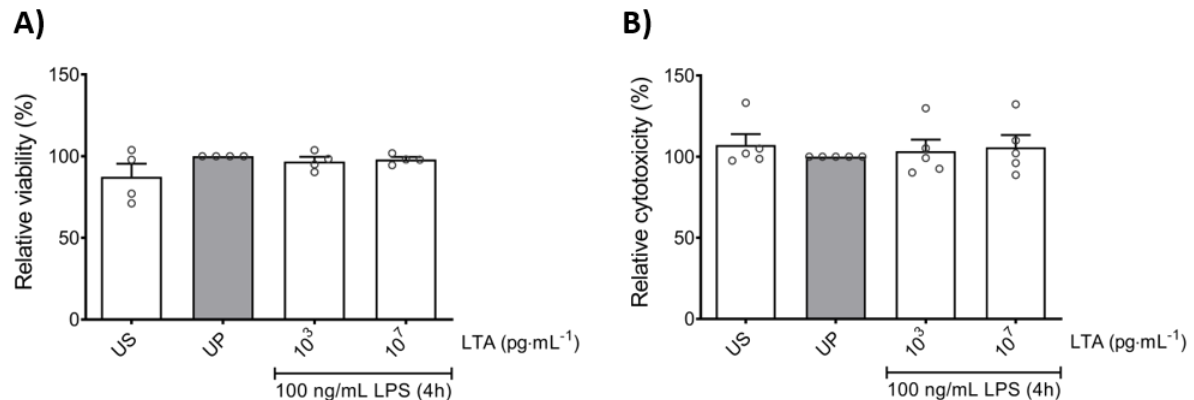

Supplementary Figure 1: Cell viability and cytotoxicity of LTA-primed murine bone marrow neutrophils. LTA-primed neutrophils (low-dose: 1 ng/mL; high-dose: 10 µg/mL) were re-stimulated on day 2 with 100 ng/mL LPS as described above. (A) Cell viability (n=4) was analysed by MTT assay, whereas (B) cytotoxicity (n=5) was measured using commercial kits as described in the method section. Data are presented as scatter dot plots (UP group assigned as 100%), mean + SEM.
